# Supplementary material for: Insights into the Relationship between Intestinal Microbiota of the Aquaculture Worm Sipunculus nudus and Surrounding Sediments
Source: MDPI journal article supplement (doi:10.3390/fishes8010032), 2023-01-03
Supplement: s1 [file s1]

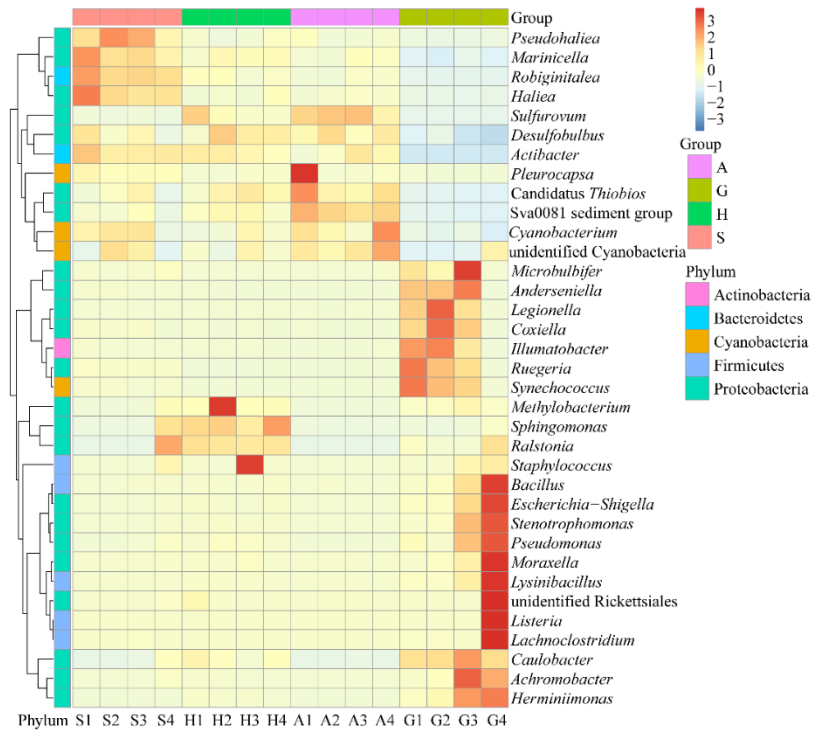

**Figure S1.** Heat map of the relative abundance of the 35 most abundant microbial genera across all samples. S—surface sediment; H—sediment in the hole; A—ambient sediment; G—gut of *S. nudus*.

**Table S1.** Sequencing information and microbial diversity estimates for the worm intestine and different sediments.

| Sample | Raw Tags | Effective reads | OTU number | ACE  | Chao 1 | Shannon | Simpson | Coverage |
|--------|----------|-----------------|------------|------|--------|---------|---------|----------|
| S1     | 146,242  | 113,147         | 3051       | 4440 | 4252   | 9.25    | 1.00    | 0.959    |
| S2     | 146,669  | 117,326         | 3190       | 4909 | 4601   | 8.97    | 0.99    | 0.954    |
| S3     | 140,448  | 111,906         | 3298       | 4908 | 4574   | 9.24    | 0.99    | 0.955    |
| S4     | 147,244  | 119,343         | 2377       | 4019 | 3738   | 6.81    | 0.89    | 0.962    |
| H1     | 86,727   | 72,209          | 2667       | 3695 | 3493   | 7.48    | 0.94    | 0.966    |
| H2     | 130,660  | 107,909         | 2727       | 4151 | 3879   | 7.78    | 0.95    | 0.961    |
| H3     | 55,077   | 45,813          | 2849       | 3614 | 3324   | 8.04    | 0.96    | 0.97     |
| H4     | 146,610  | 122,177         | 3303       | 5258 | 4894   | 8.08    | 0.95    | 0.95     |
| A1     | 93,502   | 76,966          | 3441       | 4717 | 4393   | 9.16    | 0.99    | 0.958    |
| A2     | 45,097   | 37,769          | 3093       | 3599 | 3521   | 9.44    | 0.99    | 0.975    |
| A3     | 114,245  | 93,815          | 3821       | 5750 | 5433   | 9.21    | 0.99    | 0.945    |
| A4     | 118,522  | 97,877          | 3483       | 5638 | 5326   | 8.74    | 0.98    | 0.946    |
| G1     | 146,838  | 116,253         | 1978       | 2978 | 2807   | 7.19    | 0.97    | 0.973    |
| G2     | 88,983   | 72,364          | 1343       | 1725 | 1649   | 7.17    | 0.98    | 0.986    |
| G3     | 35,939   | 29,600          | 831        | 1350 | 1743   | 6.79    | 0.98    | 0.989    |
| G4     | 146,862  | 121,639         | 876        | 1638 | 1407   | 5.19    | 0.92    | 0.985    |
